# Supplementary material
Source: PubMed Central journal article supplement (PMC4498489)
Supplement: NIHMS704512-supplement-01.pdf [file NIHMS704512-supplement-01.pdf]

# Data and analyses

## 1 Intervention v Control, by intensity of counselling intervention

| Outcome or Subgroup | Studies | Participants | Statistical Method | Effect Estimate |
|---------------------|---------|--------------|--------------------|-----------------|
|---------------------|---------|--------------|--------------------|-----------------|

## 22 Interventions for smoking cessation in hospitalised patients

|                                                           |    |      |                                |                  |
|-----------------------------------------------------------|----|------|--------------------------------|------------------|
| 1.1 <a href="#">Quit at longest follow-up (6+ months)</a> | 38 |      | Risk Ratio(M-H, Fixed, 95% CI) | Subtotals only   |
| 1.1.1 Intensity 1                                         | 1  | 1351 | Risk Ratio(M-H, Fixed, 95% CI) | 1.14[0.82, 1.59] |
| 1.1.2 Intensity 2                                         | 9  | 3975 | Risk Ratio(M-H, Fixed, 95% CI) | 1.10[0.96, 1.25] |
| 1.1.3 Intensity 3                                         | 6  | 4476 | Risk Ratio(M-H, Fixed, 95% CI) | 1.07[0.93, 1.24] |
| 1.1.4 Intensity 4                                         | 25 | 7403 | Risk Ratio(M-H, Fixed, 95% CI) | 1.37[1.27, 1.48] |

### 2 Intervention v Control, trials with post discharge intervention

| Outcome or Subgroup                                       | Studies | Participants | Statistical Method             | Effect Estimate  |
|-----------------------------------------------------------|---------|--------------|--------------------------------|------------------|
| 2.1 <a href="#">Quit at longest follow-up (6+ months)</a> | 3       | 216          | Risk Ratio(M-H, Fixed, 95% CI) | 1.51[1.03, 2.22] |

### 3 Intervention v Control, trials in rehabilitation centers

| Outcome or Subgroup                                       | Studies | Participants | Statistical Method             | Effect Estimate  |
|-----------------------------------------------------------|---------|--------------|--------------------------------|------------------|
| 3.1 <a href="#">Quit at longest follow-up (6+ months)</a> | 3       | 1310         | Risk Ratio(M-H, Fixed, 95% CI) | 1.71[1.37, 2.14] |

### 4 Intervention v Control, trials of pharmacotherapy (pharmacotherapy systematically varied by group)

| Outcome or Subgroup                                       | Studies | Participants | Statistical Method             | Effect Estimate  |
|-----------------------------------------------------------|---------|--------------|--------------------------------|------------------|
| 4.1 <a href="#">Quit at longest follow-up (6+ months)</a> | 11      |              | Risk Ratio(M-H, Fixed, 95% CI) | Subtotals only   |
| 4.1.1 NRT v Placebo or no NRT                             | 6       | 2487         | Risk Ratio(M-H, Fixed, 95% CI) | 1.54[1.34, 1.79] |
| 4.1.2 Bupropion v Placebo                                 | 3       | 480          | Risk Ratio(M-H, Fixed, 95% CI) | 1.04[0.75, 1.45] |
| 4.1.3 Varenicline v Placebo or no Varenicline             | 2       | 458          | Risk Ratio(M-H, Fixed, 95% CI) | 1.29[0.95, 1.76] |

### 5 Intervention v Control, by intervention intensity within diagnostic subgroups

| Outcome or Subgroup                                                | Studies | Participants | Statistical Method             | Effect Estimate  |
|--------------------------------------------------------------------|---------|--------------|--------------------------------|------------------|
| 5.1 <a href="#">All hospital patients, unselected by diagnosis</a> | 17      |              | Risk Ratio(M-H, Fixed, 95% CI) | Subtotals only   |
| 5.1.1 intensity 1                                                  | 1       | 1351         | Risk Ratio(M-H, Fixed, 95% CI) | 1.14[0.82, 1.59] |
| 5.1.2 Intensity 2                                                  | 2       | 1668         | Risk Ratio(M-H, Fixed, 95% CI) | 0.90[0.64, 1.28] |
| 5.1.3 Intensity 3                                                  | 4       | 4309         | Risk Ratio(M-H, Fixed, 95% CI) | 1.10[0.94, 1.29] |
| 5.1.4 Intensity 4                                                  | 12      | 4900         | Risk Ratio(M-H, Fixed, 95% CI) | 1.26[1.12, 1.42] |
| 5.2 <a href="#">Patients with cardiovascular disease</a>           | 22      | 5769         | Risk Ratio(M-H, Fixed, 95% CI) | 1.27[1.18, 1.37] |
| 5.2.1 Intensity 2                                                  | 4       | 1853         | Risk Ratio(M-H, Fixed, 95% CI) | 1.10[0.94, 1.28] |
| 5.2.2 Intensity 3                                                  | 3       | 615          | Risk Ratio(M-H, Fixed, 95% CI) | 1.04[0.84, 1.28] |
| 5.2.3 Intensity 4                                                  | 14      | 2819         | Risk Ratio(M-H, Fixed, 95% CI) | 1.42[1.29, 1.56] |
| 5.2.4 Nicotine replacement therapy                                 | 1       | 85           | Risk Ratio(M-H, Fixed, 95% CI) | 1.16[0.62, 2.18] |
| 5.2.5 Bupropion                                                    | 2       | 397          | Risk Ratio(M-H, Fixed, 95% CI) | 1.14[0.80, 1.64] |
| 5.3 <a href="#">Patients with respiratory disease</a>              | 5       |              | Risk Ratio(M-H, Fixed, 95% CI) | Subtotals only   |
| 5.3.1 Counselling                                                  | 3       | 715          | Risk Ratio(M-H, Fixed, 95% CI) | 1.22[0.93, 1.60] |
| 5.3.2 Nicotine replacement therapy                                 | 2       | 173          | Risk Ratio(M-H, Fixed, 95% CI) | 1.29[0.62, 2.69] |
